# Supplementary material for: Modulation of Cancer-Associated Fibrotic Stroma by An Integrin αvβ3 Targeting Protein for Pancreatic Cancer Treatment
Source: PubMed Central journal article supplement — Cell Mol Gastroenterol Hepatol. 2020 Aug 15;11(1):161–79. doi: 10.1016/j.jcmgh.2020.08.004 (PMC7674520; doi:10.1016/j.jcmgh.2020.08.004), 2020-08-15
Supplement: mmc1.pdf [file mmc1.pdf]

**On-line supplementary materials**

**Modulation of Cancer-associated Fibrotic Stroma by An Integrin  $\alpha_v\beta_3$   
Targeting Protein for Pancreatic Cancer Treatment**

**Ravi Chakra Turaga<sup>1#</sup>, Malvika Sharma<sup>1#</sup>, Falguni Mishra<sup>1</sup>, Alyssa Krasinskas<sup>2</sup>, Yi Yuan<sup>1</sup>,  
Jenny J. Yang<sup>3</sup>, Shiyuan Wang<sup>4</sup>, Chunfeng Liu<sup>4</sup>, Sun Li<sup>4</sup>, and Zhi-Ren Liu<sup>1\*</sup>**

**Reagents, Antibodies, and Cells used in the study are listed in table 1**

Table 1 Reagents, antibodies, and cell lines

| Reagent or Resource                   | Source                       | Identifier   |
|---------------------------------------|------------------------------|--------------|
| Gemcitabine, HCl                      | EMD Millipore                | 504594       |
| Gemcitabine-5'-triphosphate (dFdCTP)  | Sierra Bioresearch           |              |
| 2,2-Difluoro-2-deoxyuridine           | Santa Cruz Biotechnology     | sc-220827    |
| Ultravision Peroxidase block          | Thermo Scientific            | TA060H2O2Q   |
| Ultravision Protein block             | Thermo Scientific            | TA060PBQ     |
| Antibody diluent OP Quanto            | Thermo Scientific            | TA-125-ADQ   |
| Betazoid DAB Chromogen kit            | Biocare Medical              | BDB2004L     |
| DEPEX mounting media                  | Electron Microscopy Sciences | 13514        |
| Coverslips                            | Thermo Scientific            | 102420       |
| Tris Base                             | Fisher Scientific            | BP154-1      |
| Tween-20                              | Sigma-Aldrich                | P5927        |
| Citrate buffer                        | Sigma-Aldrich                | C9999-1000ML |
| Xylenes                               | Fisher Scientific            | X5-4         |
| Ethanol                               | Decon Lab                    | 22032601     |
| Large Volume Mayer's Hematoxylin      | Thermo Scientific            | TA-125-MH    |
| DirectPCR Lysis Reagent (Mouse Tail)  | Viagen Biotech               | 102-T        |
| PCR Master Mix                        | Thermo Scientific            | F548S        |
| 100bp DNA Ladder                      | Thermo Scientific            | SM1143       |
| Molecular Biology Agarose             | Bio-Rad                      | 1613101      |
| StainTray™ Slide Staining System      | Simport Scientific           | 1159J70      |
| Hypoxia Incubator Chamber             | Stemcell Technologies        | 27310        |
| Alexa Fluor 595 conjugated goat IgG   | Thermo Scientific            | A-11032      |
| Alexa Fluor 488 conjugated paclitaxel | Thermo Scientific            | P22310       |
| Cda siRNA                             | Santa Cruz Biotechnology     | sc-60342     |
|                                       |                              |              |
|                                       |                              |              |
| <b>Antibodies</b>                     |                              |              |
| $\alpha$ SMA                          | abcam                        | AB5694       |
| Phospho Akt                           | abcam                        | AB81283      |
| Cleaved caspase-3                     | abcam                        | AB49822      |
| Cytidine deaminase                    | Thermo Scientific            | PA5-27478    |
| Dck                                   | Thermo Scientific            | PA5-21846    |
| GAPDH                                 | Santa Cruz Biotechnology     | sc-32233     |
| Hif1 $\alpha$                         | MilliporeSigma               | MAB5382      |
| IGF1                                  | Thermo Scientific            | MA5-18035    |
| IGF-IR $\beta$                        | Santa-Cruz Biotechnology     | sc-390130    |
| pIGF-IR $\beta$                       | Santa Cruz Biotechnology     | sc-390130    |
| Integrin $\alpha$ V                   | Santa-Cruz Biotechnology     | sc-6617 P    |
| Integrin $\beta$ 3                    | Sigma-Aldrich                | SAB4300361   |
| PECAM-1/CD31                          | abcam                        | AB9498       |

|                                                      |                            |                |
|------------------------------------------------------|----------------------------|----------------|
| Tdk                                                  | Thermo Scientific          | PA5-13813      |
| Ki67                                                 | abcam                      | AB15580        |
| Proteinase K                                         | Thermo Scientific          | EO0491         |
|                                                      |                            |                |
| <b>Chemicals, Peptides, and Recombinant Proteins</b> |                            |                |
| Recombinant murine IGF1                              |                            | 791-MG         |
|                                                      |                            |                |
| <b>Commercial Assay kits</b>                         |                            |                |
|                                                      |                            |                |
| Picro sirus red staining kit                         | IHC world                  | IW-3012        |
| Masson's trichrome kit                               | IHC world                  | IW-3006        |
| Human IGF1 ELISA kit                                 | R&D systems                | DG100          |
| Novaultra Oil red O stain kit                        | IHC world                  | IW-3008        |
| Annexin V-FITC Apoptosis Staining Kit                | abcam                      | ab14085        |
| BrdU Cell Proliferation Assay                        | Millipore                  | 2752           |
| <i>Mouse IGF1 ELISA kit</i>                          | <i>R&amp;D systems</i>     | <i>MG100</i>   |
|                                                      |                            |                |
| <b>Experimental Models: Cell Lines</b>               |                            |                |
| KPC 961                                              | Gift from Dr. Pankaj Singh | Univ. Nebraska |
| BxPC3                                                | ATCC                       | CRL-1687       |
| Panc1                                                | ATCC                       | CRL-1469       |
| Panc89                                               | Gift from Dr. Ritu Aneja   | GSU            |
| MiaPaca-2                                            | ATCC                       | CRL-1420       |
| Capan1                                               | ATCC                       | CRL-1687       |
|                                                      |                            |                |
| <b>Experimental Models: Animals</b>                  |                            |                |
| Mouse: Kras+/LSL-G12D; (C57BL/6J background)         | The Jackson Laboratory     | 008179         |
| Mouse: Trp53+/LSL-R172H (C57BL/6J background)        | The Jackson Laboratory     | 008652         |
| Mouse: Pdx1-Cre (C57BL/6J background)                | The Jackson Laboratory     | 014647         |
| Mouse: C57BL/6J (for OrKPC)                          | The Jackson Laboratory     | 000664         |
| Athymic nude mice (for xenograft)                    | ENVIGO                     |                |
